# Supplementary material for: Isostructurality of quinoxaline crystal phases: the interplay of weak hydrogen bonds and halogen bonding
Source: Royal Society of Chemistry journal article supplement (doi:10.1039/d1ce00878a), 2021-01-01
Supplement: d1ce00878a1.pdf [file d1ce00878a1.pdf]

## Supporting Information for Isostructurality of Quinoxaline Crystal Phases: The Interplay of Weak Hydrogen Bonds and Halogen Bonding

### 1. Conformation of Molecular Structures

Table S1. Crystallographic Data for Samples.

| Identification code                         | <b>Q3,3'F<sub>2</sub></b>                                     | <b>Q,3,3'Cl<sub>2</sub></b>                                    | <b>Q3,3'I<sub>2</sub></b>                                     | <b>Q3,3'Me<sub>2</sub></b>                               |
|---------------------------------------------|---------------------------------------------------------------|----------------------------------------------------------------|---------------------------------------------------------------|----------------------------------------------------------|
| Empirical formula                           | C <sub>20</sub> H <sub>12</sub> F <sub>2</sub> N <sub>2</sub> | C <sub>20</sub> H <sub>12</sub> Cl <sub>2</sub> N <sub>2</sub> | C <sub>20</sub> H <sub>12</sub> I <sub>2</sub> N <sub>2</sub> | C <sub>22</sub> H <sub>18</sub> N <sub>2</sub>           |
| Formula weight                              | 318.32                                                        | 351.22                                                         | 534.12                                                        | 310.38                                                   |
| Temperature/K                               | 99.82                                                         | 296.15                                                         | 99.87                                                         | 99.78                                                    |
| Crystal system                              | monoclinic                                                    | monoclinic                                                     | monoclinic                                                    | monoclinic                                               |
| Space group                                 | P2 <sub>1</sub> /n                                            | P2 <sub>1</sub> /n                                             | P2 <sub>1</sub> /n                                            | P2 <sub>1</sub> /n                                       |
| a/Å                                         | 12.7621(18)                                                   | 13.368(3)                                                      | 8.6398(5)                                                     | 12.313(4)                                                |
| b/Å                                         | 7.6916(9)                                                     | 7.5374(12)                                                     | 19.4072(10)                                                   | 7.563(2)                                                 |
| c/Å                                         | 15.439(2)                                                     | 16.175(4)                                                      | 10.7039(6)                                                    | 17.916(5)                                                |
| α/°                                         | 90                                                            | 90                                                             | 90                                                            | 90                                                       |
| β/°                                         | 101.230(7)                                                    | 104.640(9)                                                     | 101.237(3)                                                    | 102.333(11)                                              |
| γ/°                                         | 90                                                            | 90                                                             | 90                                                            | 90                                                       |
| Volume/Å <sup>3</sup>                       | 1486.5(3)                                                     | 1576.9(5)                                                      | 1760.36(17)                                                   | 1630.0(8)                                                |
| Z                                           | 4                                                             | 4                                                              | 4                                                             | 4                                                        |
| ρ <sub>calc</sub> /cm <sup>3</sup>          | 1.422                                                         | 1.479                                                          | 2.015                                                         | 1.265                                                    |
| μ/mm <sup>-1</sup>                          | 0.102                                                         | 0.414                                                          | 3.576                                                         | 0.074                                                    |
| F(000)                                      | 656.0                                                         | 720.0                                                          | 1008.0                                                        | 656.0                                                    |
| Crystal size/mm <sup>3</sup>                | 0.38 × 0.21 × 0.13                                            | 0.75 × 0.54 × 0.10                                             | 0.47 × 0.1 × 0.1                                              | 0.53 × 0.12 × 0.1                                        |
| Radiation                                   | MoKα<br>(λ = 0.71073)                                         | MoKα<br>(λ = 0.71073)                                          | MoKα<br>(λ = 0.71073)                                         | MoKα<br>(λ = 0.71073)                                    |
| 2θ range for data collection/°              | 5.38 to 61.156                                                | 5.206 to 60.94                                                 | 5.246 to 70.882                                               | 5.868 to 61.1                                            |
| Index ranges                                | -18 ≤ h ≤ 18<br>-8 ≤ k ≤ 10<br>-22 ≤ l ≤ 22                   | -17 ≤ h ≤ 14<br>-8 ≤ k ≤ 10<br>-11 ≤ l ≤ 20                    | -13 ≤ h ≤ 13<br>-28 ≤ k ≤ 31<br>-17 ≤ l ≤ 17                  | -17 ≤ h ≤ 17<br>-10 ≤ k ≤ 10<br>-24 ≤ l ≤ 25             |
| Reflections collected                       | 22288<br>4452                                                 | 8785<br>3565                                                   | 39187<br>7651                                                 | 22160<br>4920                                            |
| Independent reflections                     | [R <sub>int</sub> = 0.1004, R <sub>sigma</sub> = 0.1129]      | [R <sub>int</sub> = 0.0402, R <sub>sigma</sub> = 0.0774]       | [R <sub>int</sub> = 0.0564, R <sub>sigma</sub> = 0.0600]      | [R <sub>int</sub> = 0.0977, R <sub>sigma</sub> = 0.0973] |
| Data/restraints/parameters                  | 4452/0/265                                                    | 3565/0/265                                                     | 7651/0/217                                                    | 4920/0/289                                               |
| Goodness-of-fit on F <sup>2</sup>           | 1.018                                                         | 1.012                                                          | 1.022                                                         | 1.036                                                    |
| Final R indexes [I] ≥ 2σ (I)                | R <sub>1</sub> = 0.0592,<br>wR <sub>2</sub> = 0.1002          | R <sub>1</sub> = 0.0450,<br>wR <sub>2</sub> = 0.0847           | R <sub>1</sub> = 0.0461,<br>wR <sub>2</sub> = 0.0947          | R <sub>1</sub> = 0.0850,<br>wR <sub>2</sub> = 0.2017     |
| Final R indexes [all data]                  | R <sub>1</sub> = 0.1424,<br>wR <sub>2</sub> = 0.1237          | R <sub>1</sub> = 0.0917,<br>wR <sub>2</sub> = 0.1008           | R <sub>1</sub> = 0.0854,<br>wR <sub>2</sub> = 0.1067          | R <sub>1</sub> = 0.1509,<br>wR <sub>2</sub> = 0.2449     |
| Largest diff. peak/hole / e Å <sup>-3</sup> | 0.33/-0.33                                                    | 0.34/-0.35                                                     | 2.95/-1.61                                                    | 0.75/-0.42                                               |

# 2D-NOESY NMR Spectra

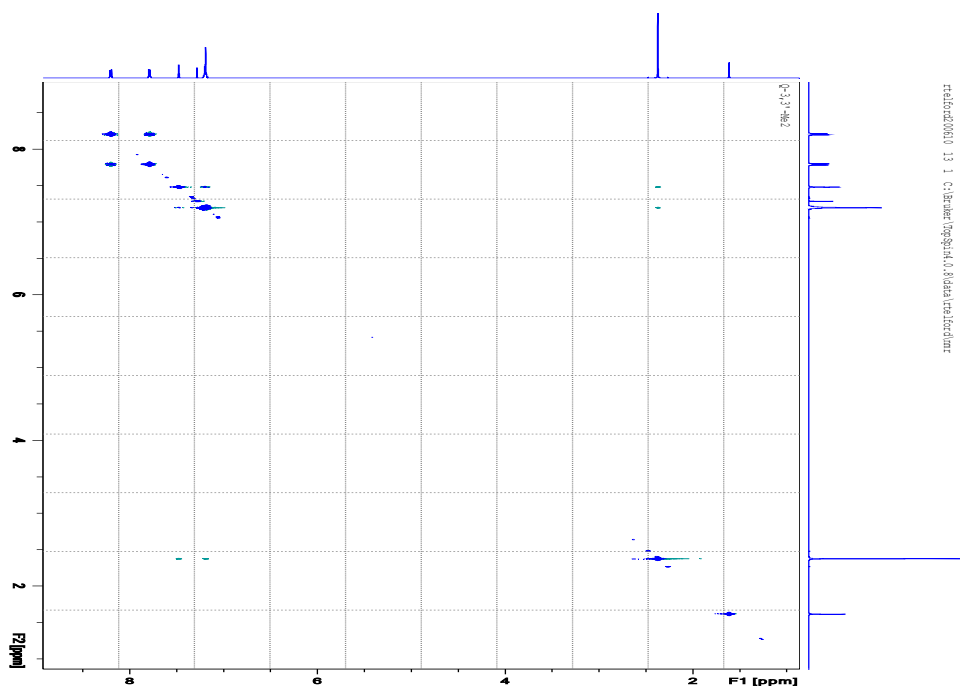

relat0221001\_11\_1\_C:\data\log\qsh\1.0\data\relat0221001

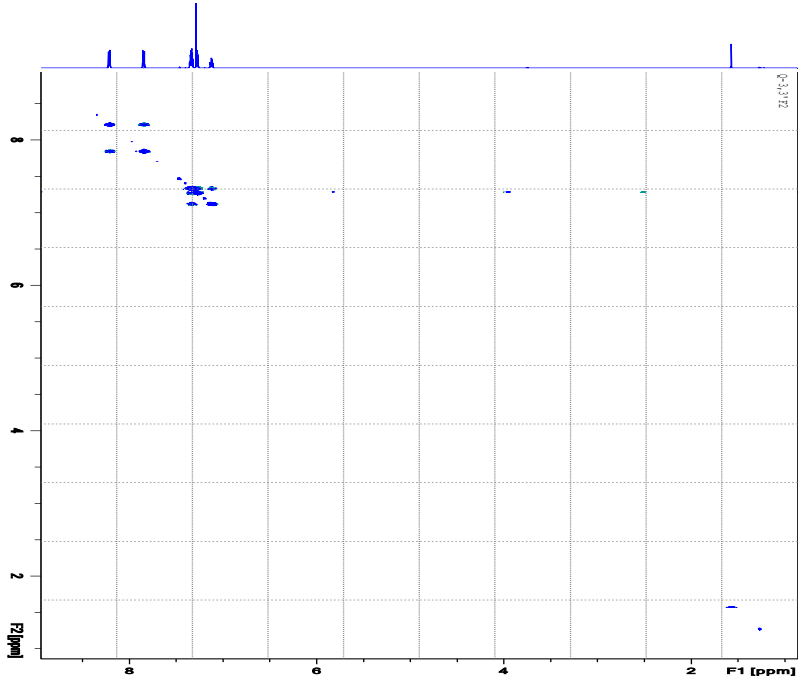

relat:0.001610 23 1 C:\Baser\log\qsh\1.0\data\cal\cal.dmr

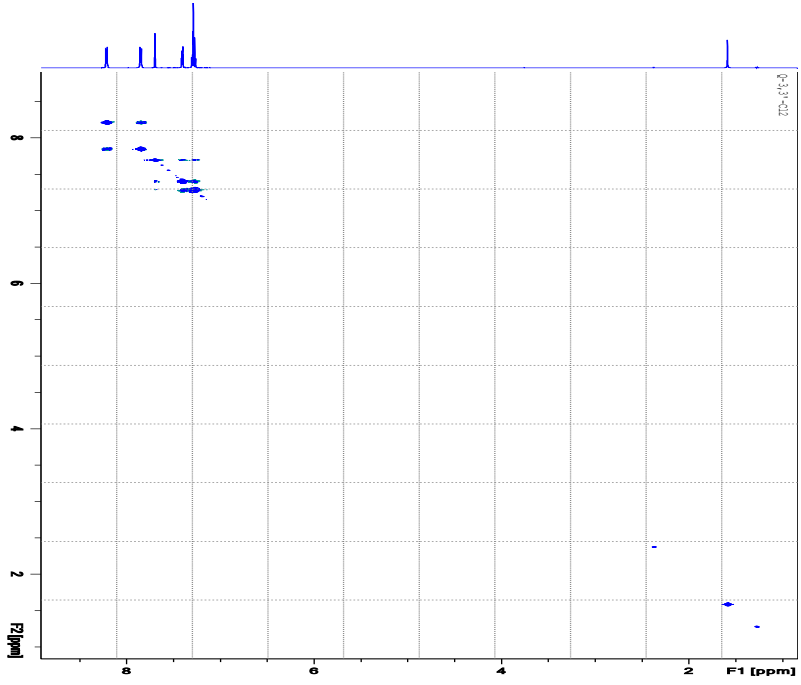

relax:201810\_33\_1\_C:\Biac\log\qsh\1.0\data\relax.dmr

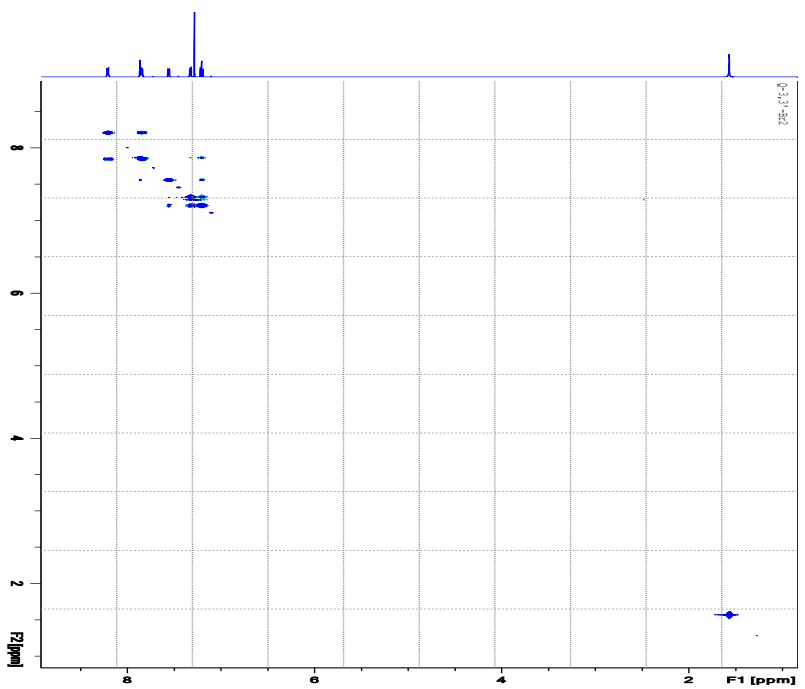

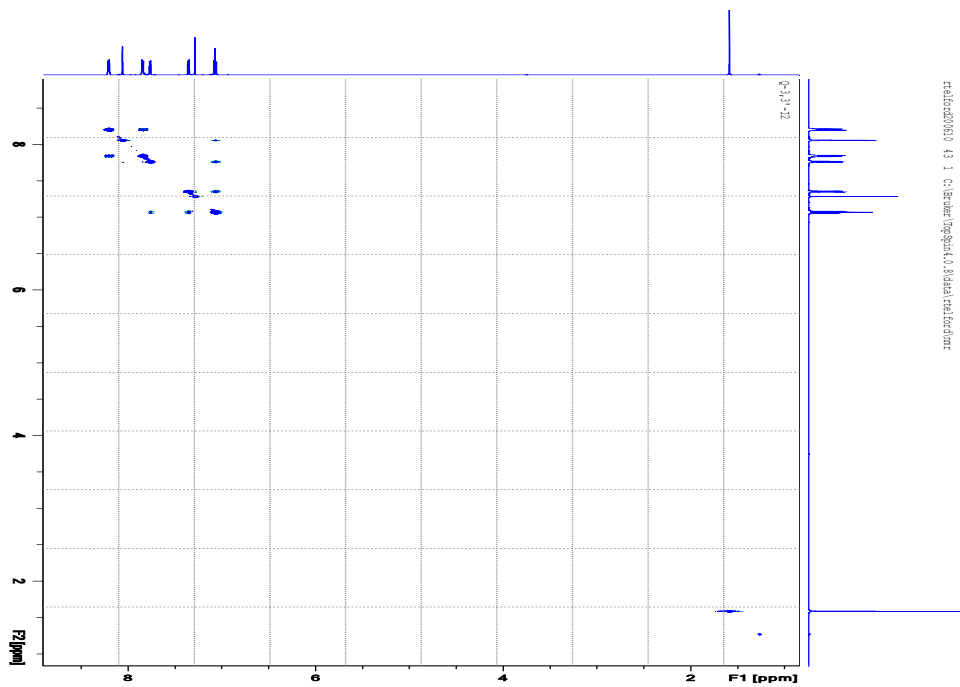

Figure S1. NOESY NMR data obtained from **Q3,3'Me<sub>2</sub>**, **Q3,3'F<sub>2</sub>**, **Q3,3'Cl<sub>2</sub>**, **Q3,3'Br<sub>2</sub>** and **Q3,3'I<sub>2</sub>**

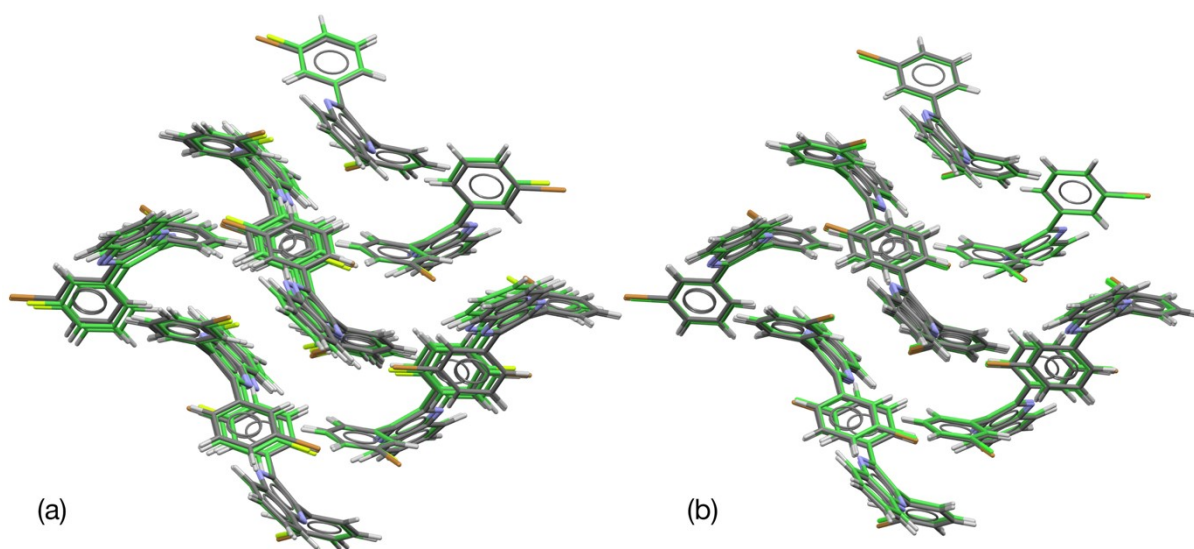

Figure S2. Overlay of the crystal structure of **Q3,3'Br<sub>2</sub>** with those of (a) **Q3,3'F<sub>2</sub>** and (b) **Q3,3'Cl<sub>2</sub>** showing the isostructurality of the three structures. The **Q3,3'Br<sub>2</sub>** structure has grey

carbon atoms while the other structures shown with green carbon atoms. Both images are viewed along the a-axis of the crystals.

## 2. Conformation of Polymorphism

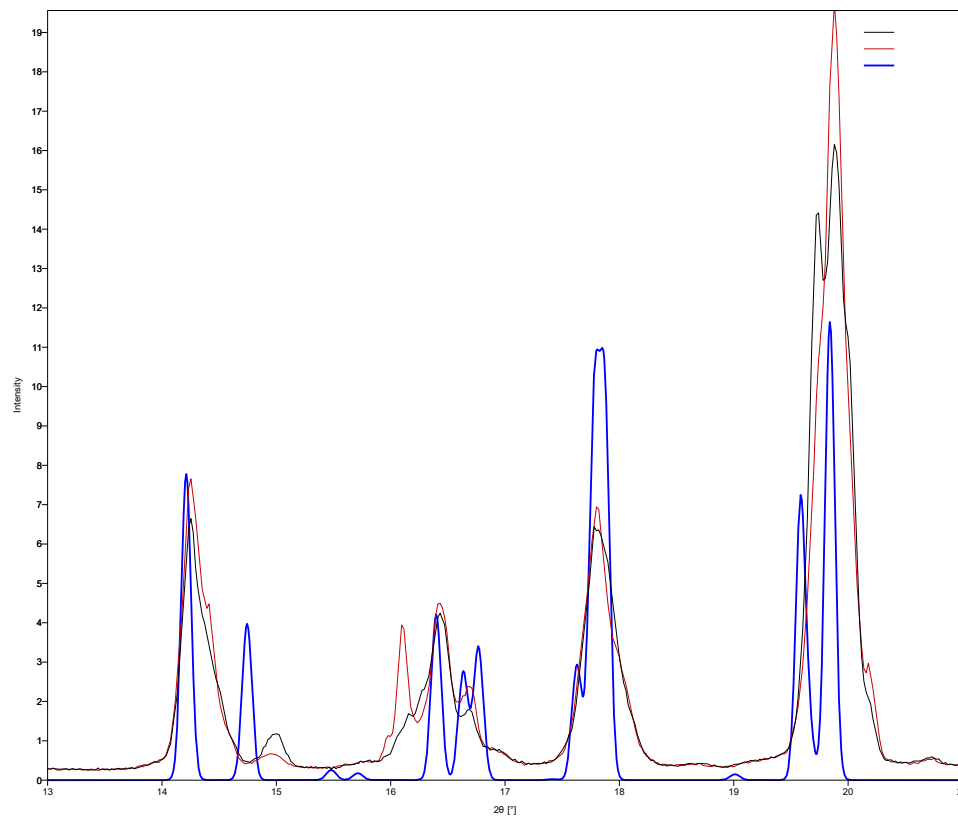

Figure S3. Comparison of **Q3,3'H<sub>2</sub>** PXRD data. Simulated data from single crystal structure (ODEJAJ, blue line), experimental data of two samples (black and red lines).



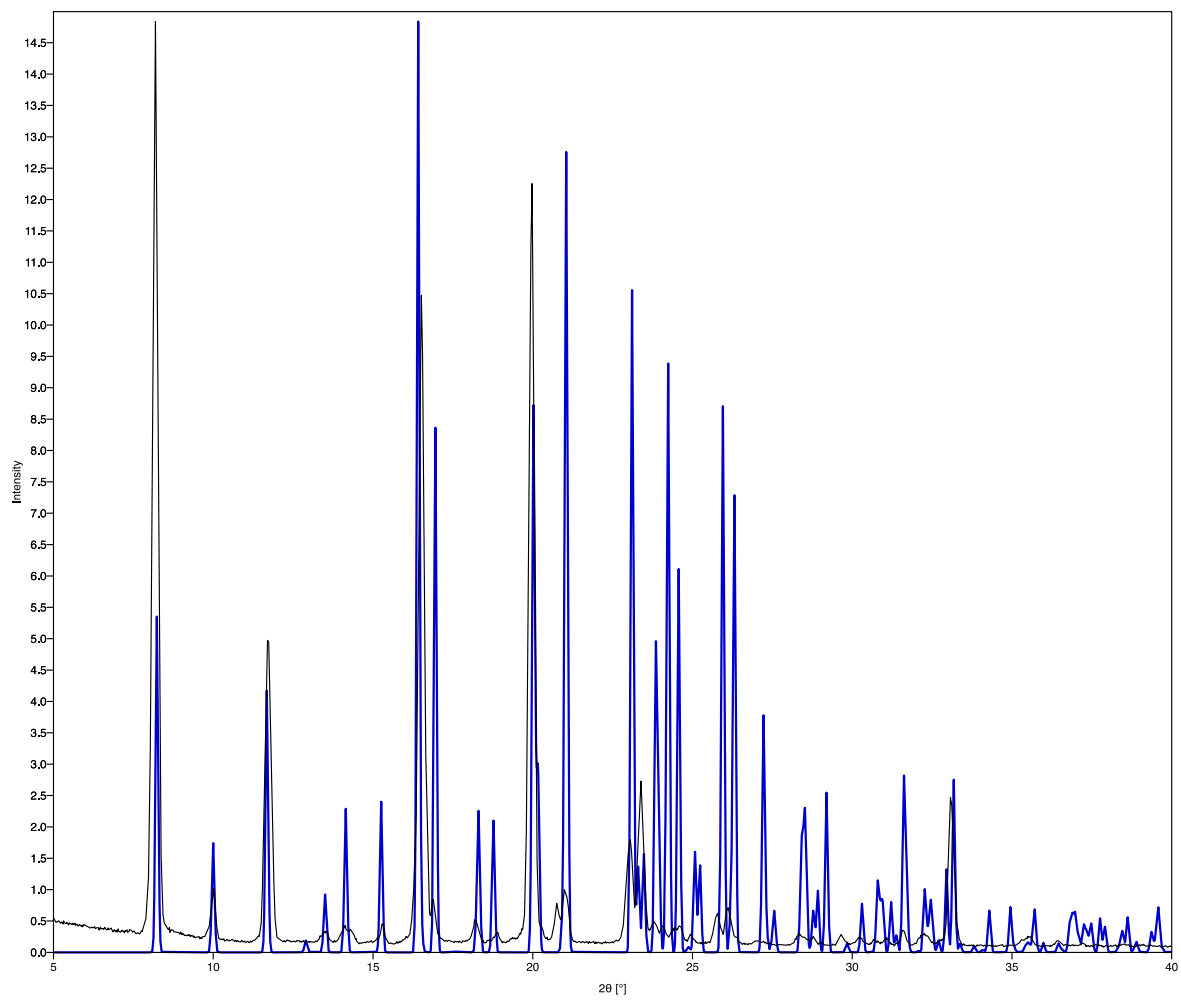

Figure S4. Comparison of PXR D patterns for  $Q_{3,3'}F_2$  recrystallised from pet. ether and simulated from single crystal structure.

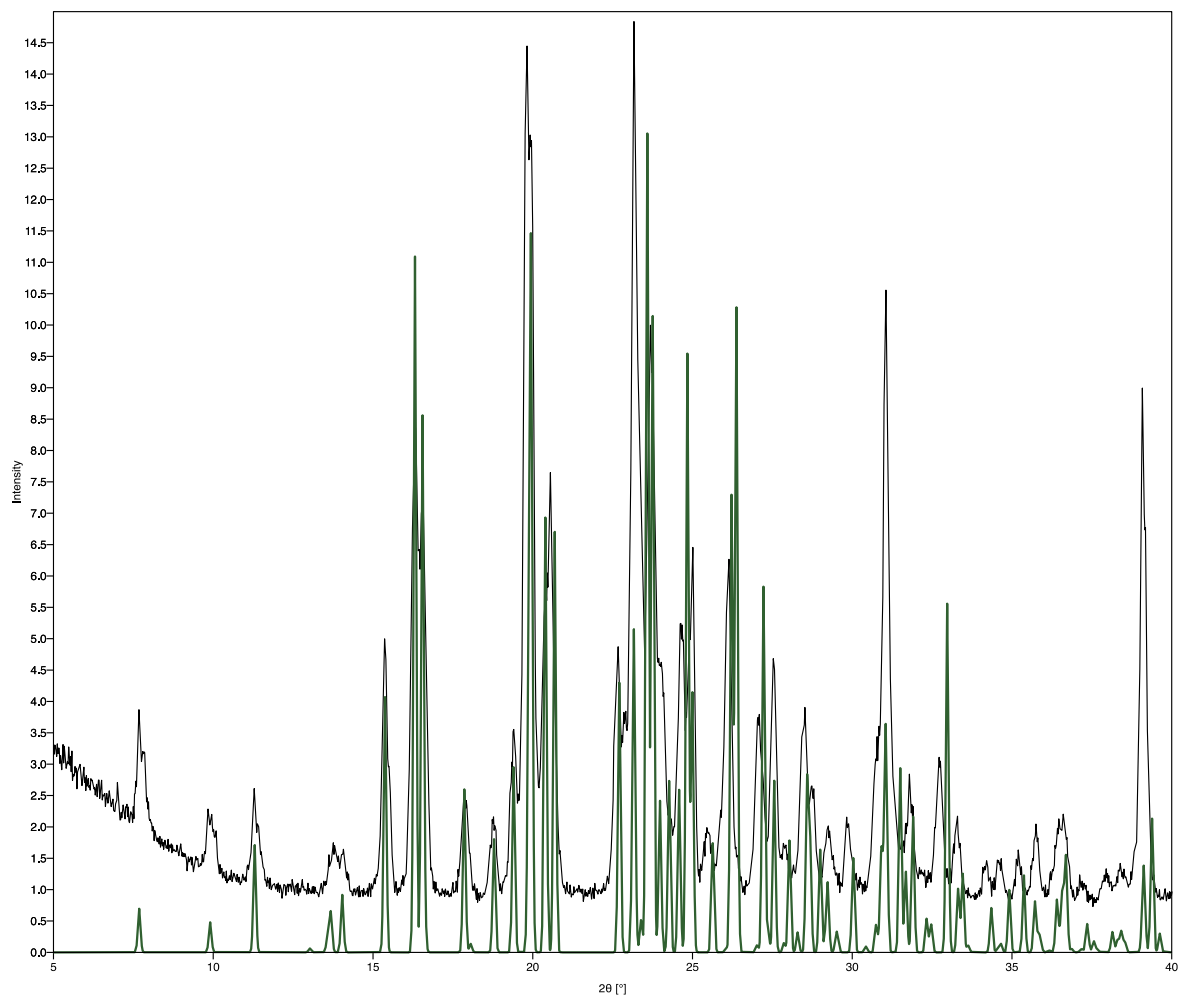

Figure S5. Comparison of PXR D patterns for **Q3,3'Cl<sub>2</sub>** recrystallised from pet. ether and simulated from single crystal structure.

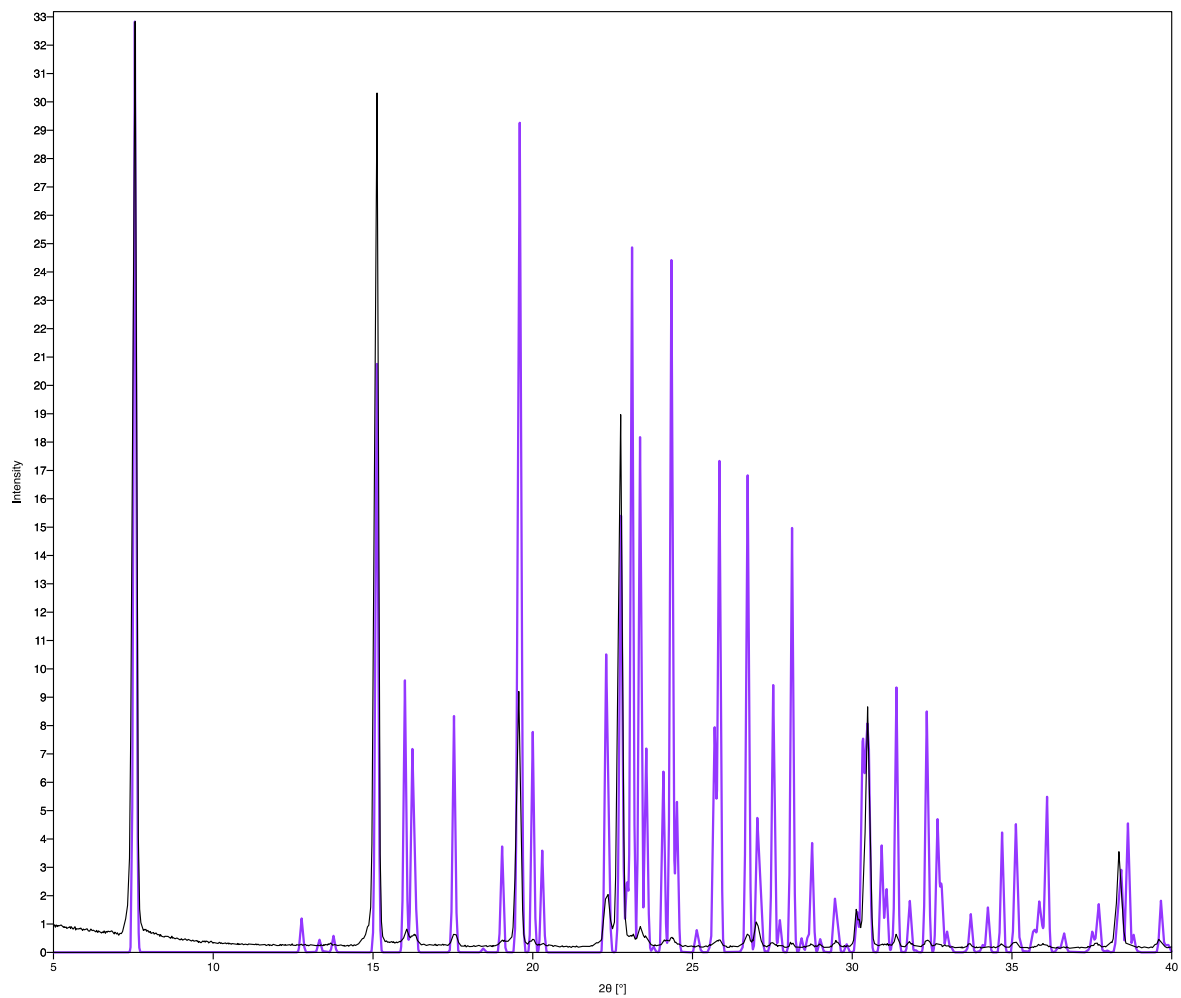

Figure S6. Comparison of PXRd patterns for **Q3,3'Br<sub>2</sub>** recrystallised from pet. ether and simulated from single crystal structure.

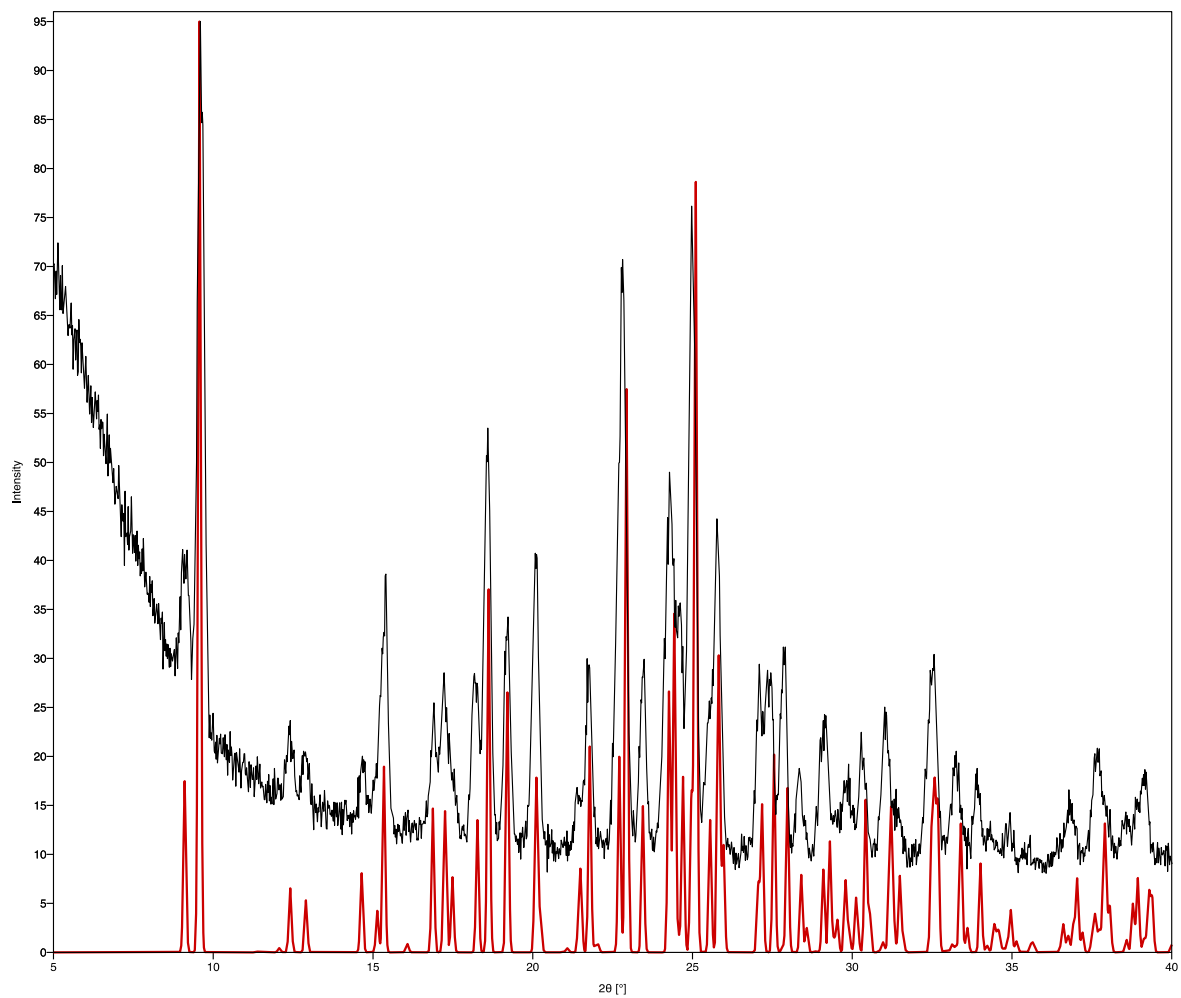

Figure S7. Comparison of PXRd patterns for **Q3,3'Br<sub>2</sub>** recrystallised from Pet. Ether and simulated from single crystal structure.

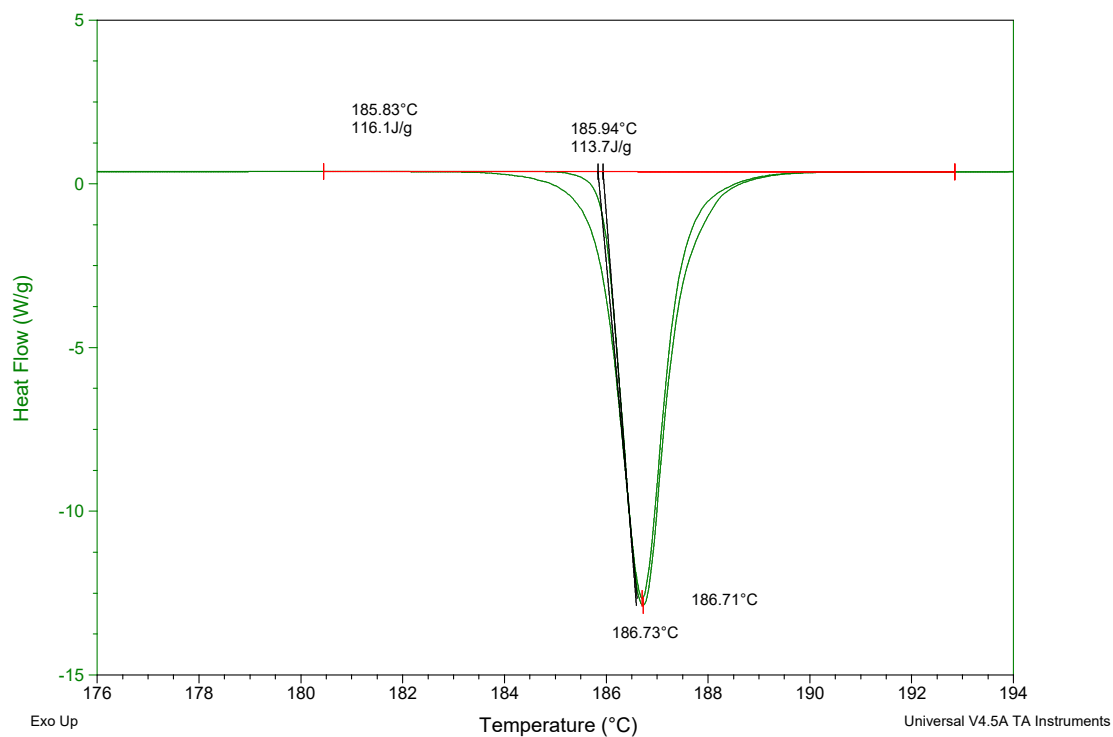

Figure S8. DSC trace for the first and second heating cycles of **Q3,3'I<sub>2</sub>**.

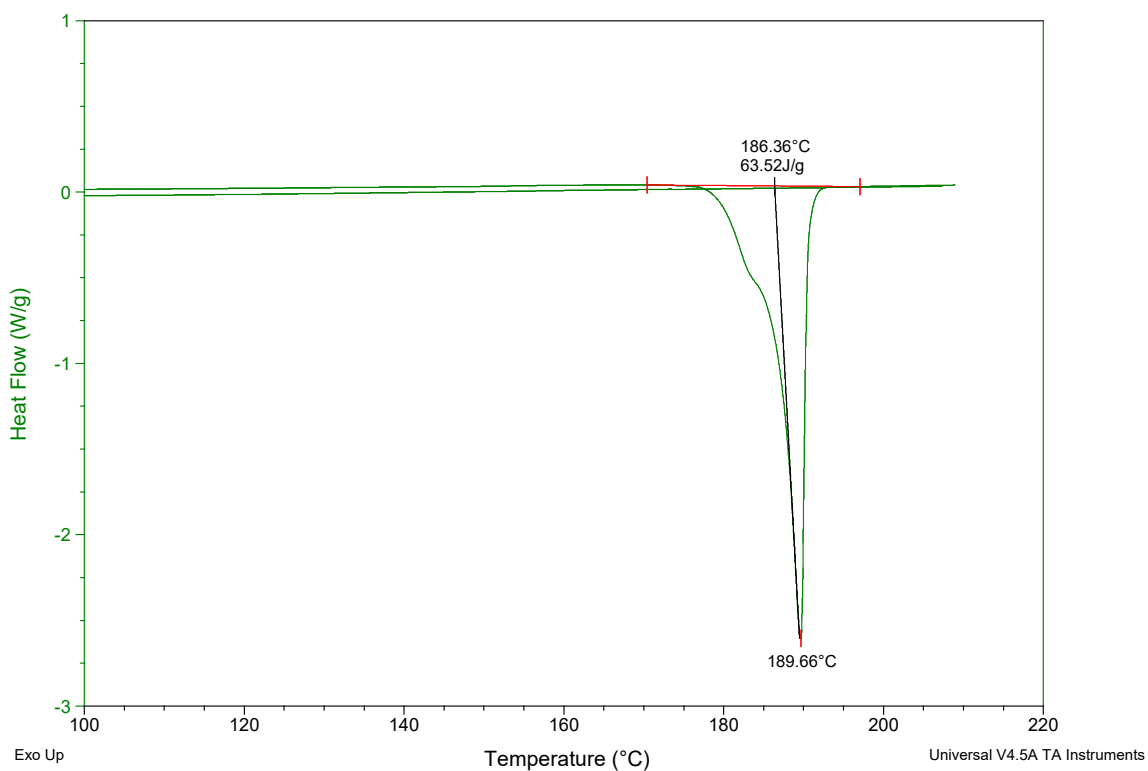

Figure S9. DSC trace for the first and second heating cycles of **Q3,3'I<sub>2</sub>**.
